# Supplementary material for: Pt nanoparticle supported on nanocrystalline CeO2: highly selective catalyst for upgradation of phenolic derivatives present in bio-oil
Source: Royal Society of Chemistry journal article supplement (doi:10.1039/c4ta04542d), 2014-09-30
Supplement: c4ta04542d1.pdf [file c4ta04542d1.pdf]

## Supporting Information

### **Pt nanoparticle supported on nanocrystalline CeO<sub>2</sub>: Highly selective catalyst for up-gradation of phenolic derivatives present in bio-oil**

Bipul Sarkar,<sup>a</sup> Chandrashekar Pendem,<sup>a</sup> L. N. Sivakumar Konathala,<sup>a</sup> Takehiko Sasaki,<sup>b</sup> and Rajaram Bal <sup>a\*</sup>

Figure S1

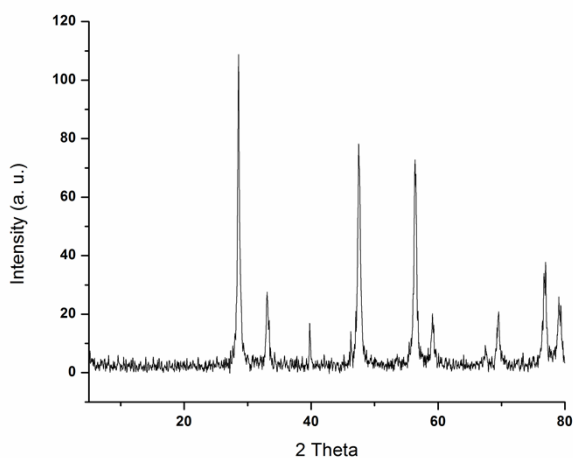

Figure S1. XRD spectra (with a scan rate of 0.1°/min) of 2%Pt-CeO<sub>2</sub> catalyst.

Figure S2

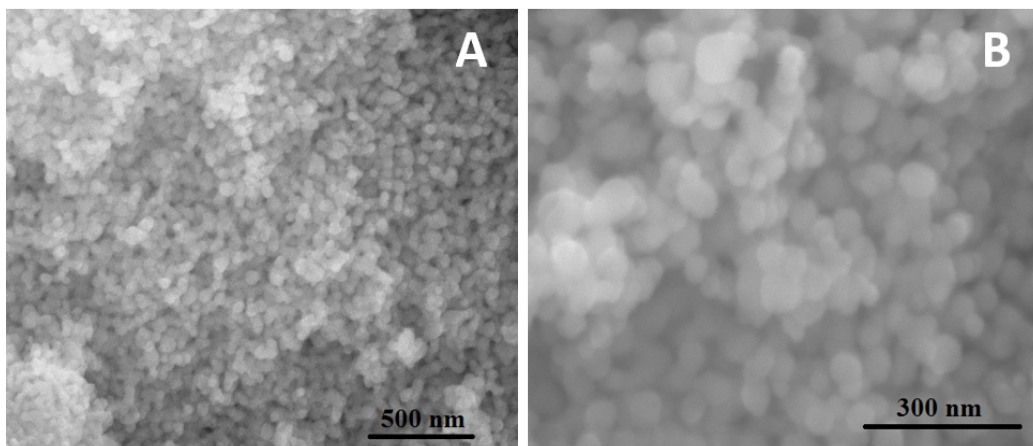

Figure S2. SEM images of 2%Pt-CeO<sub>2</sub> samples showing homogeneously distributed CeO<sub>2</sub> crystallites of size between 15-30 nm.

Figure S3

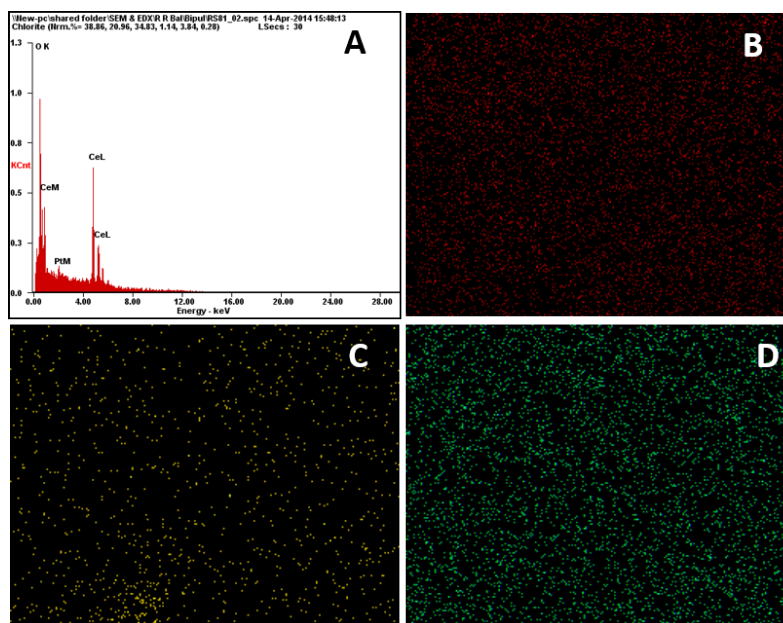

Figure S3. EDAX (A) and elemental mapping (B-D) of as prepared 2%Pt-CeO<sub>2</sub> catalyst; where B, C and D corresponds to the elemental mapping of O, Pt and Ce respectively.

Figure S4

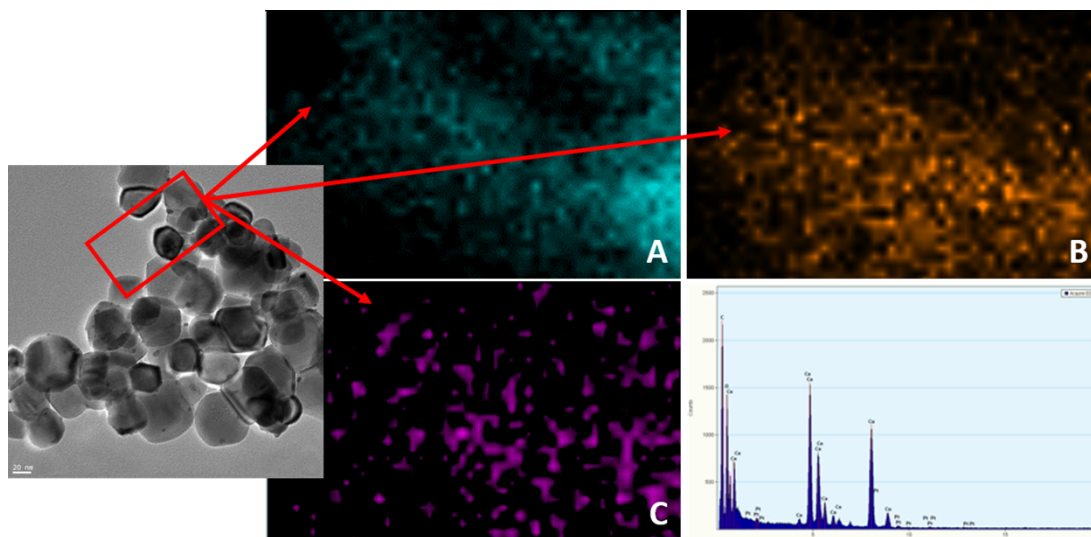

Figure S4. Elemental mapping (A-C) and EDAX (D) analysed by HR-TEM of prepared 2%Pt-CeO<sub>2</sub> catalyst; where A, B and C corresponds to the elemental mapping of Ce, O and Pt respectively. (Inset: quantitative percentage of the element of the catalyst).

Figure S5

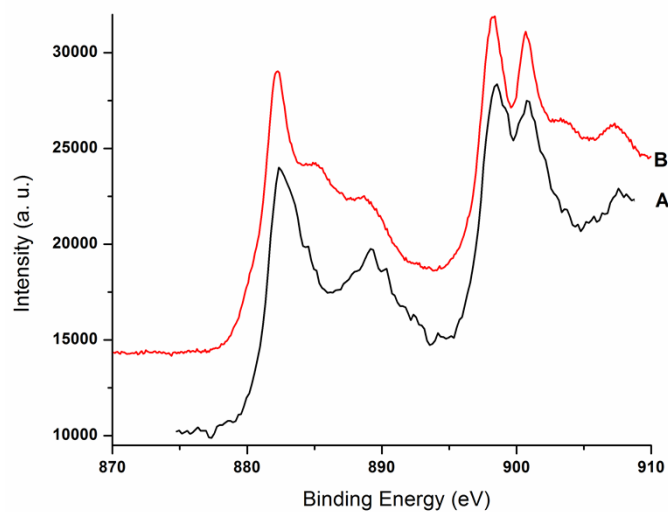

Figure S5. X-ray photoelectron spectra of Ce 3d in (A) fresh and (B) used Pt-CeO<sub>2</sub> catalyst.

Figure S6

(A) Fresh Catalyst

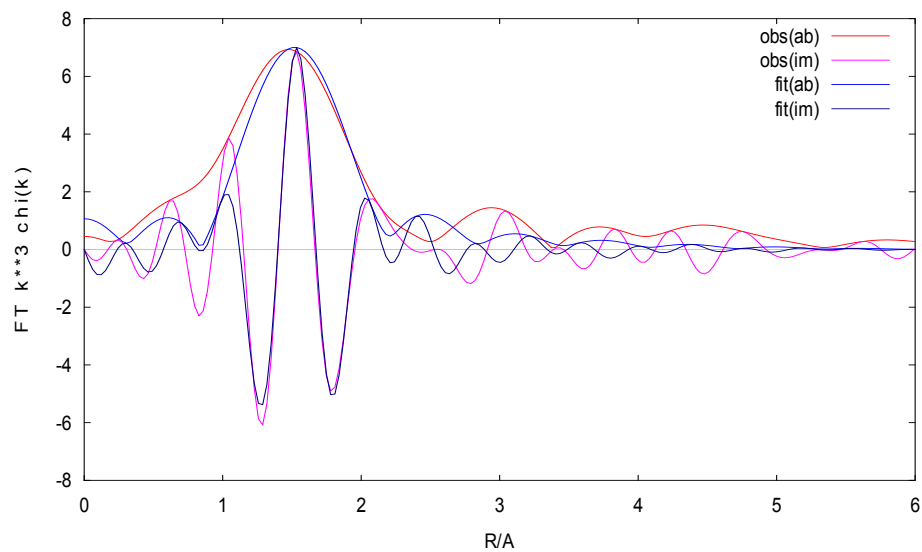

(B) Spent Catalyst

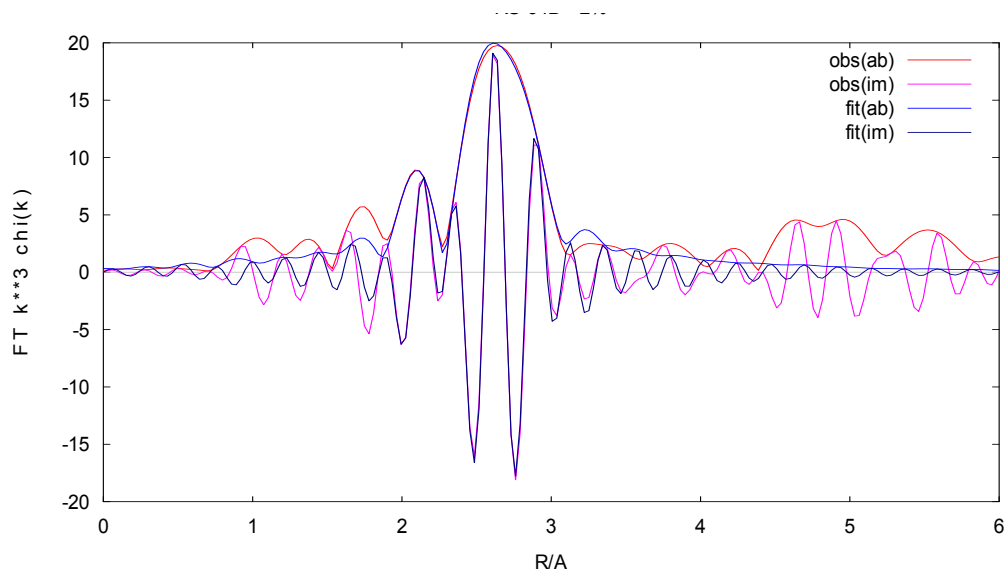

Figure S6.  $k_3$ -weighted Fourier transform of Pt-K edge EXAFS for the fresh (A) and spent (B) 2%Pt-CeO<sub>2</sub> catalyst.

Figure S7

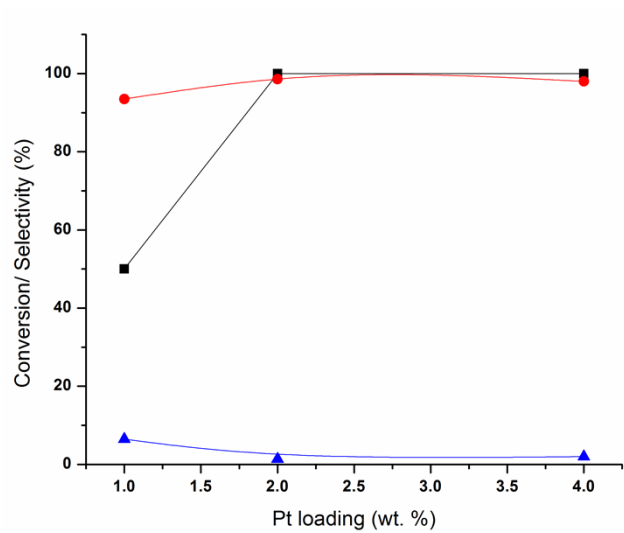

Figure S7. Influence of Pt loading as a function of phenol conversion [■]; cyclohexanol [●] and cyclohexanone [▲] selectivity.

Figure S8

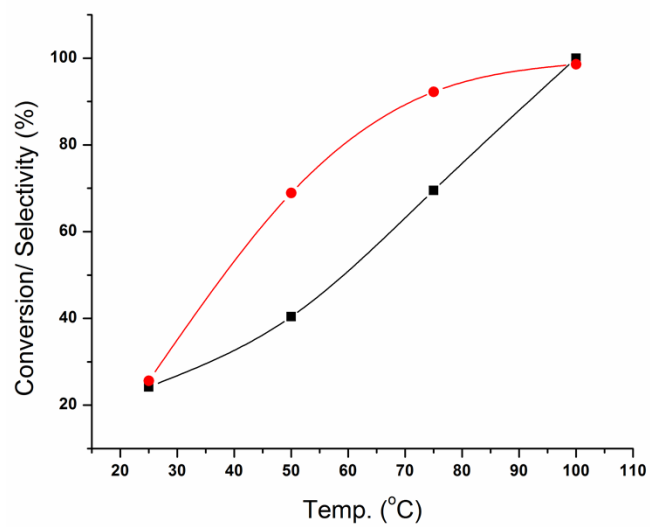

Figure S8. Influence of reaction temperature as a function of phenol conversion [■] and cyclohexanol [●] selectivity.

Figure S9

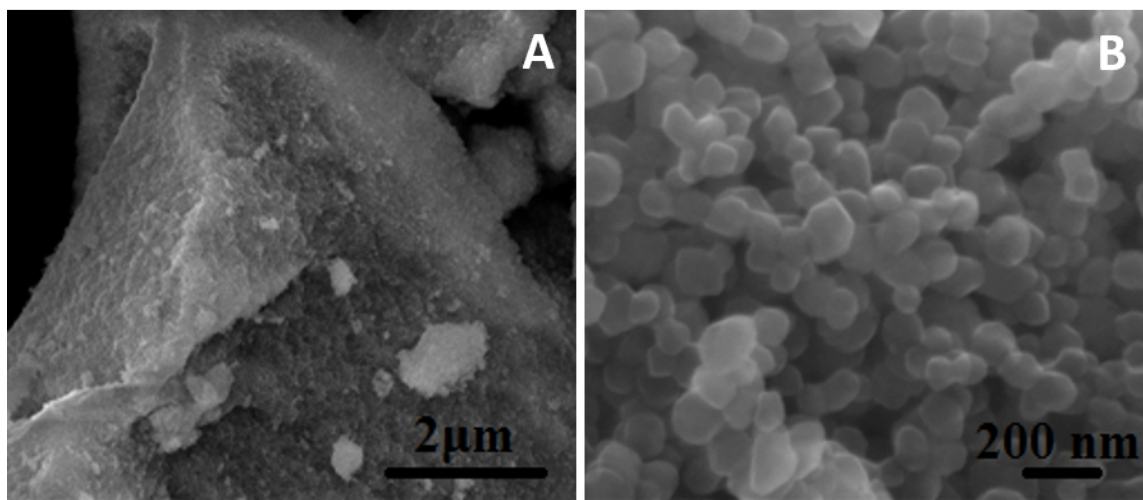

Figure S9. SEM images of commercially CeO<sub>2</sub> nanoparticle showing CeO<sub>2</sub> crystallites of size between 60-140 nm.

Figure S10

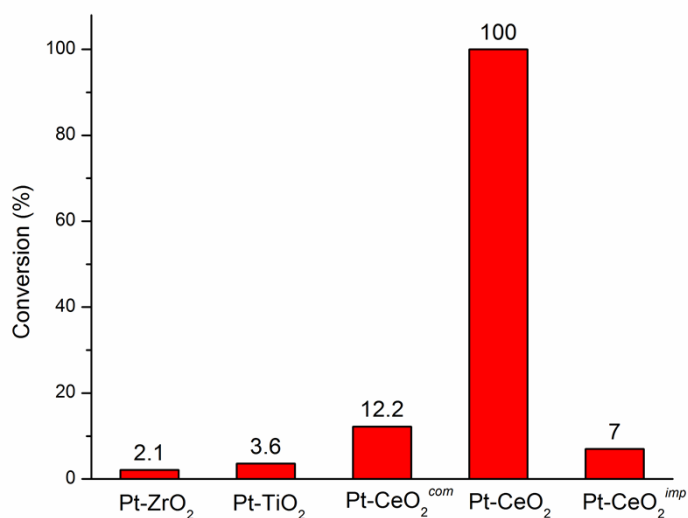

Figure S10. Activity of the different supported Pt catalyst in hydrogenation of phenol.

Pt supported on ZrO<sub>2</sub>, TiO<sub>2</sub> shows negligible activity, whereas Pt supported on commercial CeO<sub>2</sub> nanopowder shows enhancement of activity during hydrogenation of phenol. The result clearly indicates that the CeO<sub>2</sub> is a better support for hydrogenation. When we used CeO<sub>2</sub> prepared by our method, the activity took more than 8 fold increase and give 100% phenol conversion, confirming smaller CeO<sub>2</sub> as well as Pt has vital role for phenol dehydrogenation. The Pt-CeO<sub>2</sub> catalyst prepared by impregnation method has also shows nominal activity. Based on the result we believe CeO<sub>2</sub> is the better support for hydrogenating reaction. We also found that Pt nanoparticle supported on commercial CeO<sub>2</sub> showed little activity. So we believe

that Pt nanoparticle (1-5 nm), CeO<sub>2</sub> nanoparticle (15-30nm) and the synergistic effect between Pt nanoparticles and CeO<sub>2</sub> nanoparticles play the key role for this high activity.

### Turn over frequency (TOF):

TOF and TON is calculated using the following equation

$$TON = \frac{\text{Moles of desired product formed}}{\text{Number of active center}}$$

$$TOF = \frac{\text{Turn over number (TON)}}{\text{Time of reaction}}$$

Detail calculation of TOF for the entry in Table 1 as follows

| Entry | Catalyst                               | Metal loading (%) | Active metal (mol) | Conversion (mole %) | Conversion (mol) | TON      | Time (h) | TOF (h <sup>-1</sup> ) |
|-------|----------------------------------------|-------------------|--------------------|---------------------|------------------|----------|----------|------------------------|
| 1     | CeO <sub>2</sub>                       | 0                 | 0                  | 0                   | 0                | -        | 3        | -                      |
| 2     | 2%Ni- CeO <sub>2</sub>                 | 2                 | 3.40716E-05        | 24                  | 0.0024           | 70.44    | 3        | 23.48                  |
| 3     | 2%Re- CeO <sub>2</sub>                 | 2                 | 1.07527E-05        | 20                  | 0.002            | 186      | 3        | 62                     |
| 4     | 2%Pd- CeO <sub>2</sub>                 | 2                 | 1.88679E-05        | 61                  | 0.0061           | 323.3    | 3        | 107.76                 |
| 5     | 2%Rh- CeO <sub>2</sub>                 | 2                 | 1.94363E-05        | 24                  | 0.0024           | 123.48   | 3        | 41.16                  |
| 6     | 2%Pt- CeO <sub>2</sub>                 | 2                 | 1.02564E-05        | 100                 | 0.01             | 975      | 3        | 325                    |
| 7     | 2%Pt- CeO <sub>2</sub>                 | 2                 | 1.02564E-05        | 100                 | 0.01             | 975      | 1.5      | 650                    |
| 8     | 2%Pt- CeO <sub>2</sub>                 | 2                 | 1.02564E-05        | 12                  | 0.0012           | 117      | 3        | 39                     |
| 9     | 2%Pt- CeO <sub>2</sub>                 | 2                 | 1.02564E-05        | 98                  | 0.0098           | 955.5    | 3        | 318.5                  |
| 10    | 2%Pt- CeO <sub>2</sub> <sup>imp</sup>  | 2                 | 1.02564E-05        | 67.6                | 0.00676          | 659.1    | 3        | 219.7                  |
| 11    | 5%Pd-C*                                | 5                 | 9.39673E-06        | 26                  | 0.0026           | 276.692  | 3        | 92.23                  |
| 12    | Pd-AlCl <sub>3</sub> *                 | 5                 | 4.69836E-06        | 78                  | 0.000078         | 16.60152 | 12       | 1.38                   |
| 13    | Pd@mpg-C <sub>3</sub> N <sub>4</sub> * | 5                 | 1.17459E-05        | 99                  | 0.000495         | 42.14232 | 4        | 10.53558               |
| 14    | Pd NP <sub>s</sub> *                   | 100               | 9.39673E-05        | 99                  | 0.00198          | 21.07116 | 16       | 1.316948               |
| 15    | 10%Pd@C*                               | 10                | 4.69836E-05        | 100                 | 0.001            | 21.284   | 20       | 1.0642                 |

\*TOF and TON calculation of the entry 11-15 is done on the basis of the data available in the cited reference 2b, 7a, 18, 18a and 18b of the manuscript.
